# Supplementary material for: Identifying and Exploring the Impact Factors for Intraocular Pressure Prediction in Myopic Children with Atropine Control Utilizing Multivariate Adaptive Regression Splines
Source: MDPI journal article supplement (doi:10.3390/jpm14010125), 2024-01-22
Supplement: s1 [file s1]

## Supplementary Materials

**Table S1.** Formula of the five used metrics in this study.

| Metrics | Formula                                                                     |
|---------|-----------------------------------------------------------------------------|
| MAPE    | $MAPE = \frac{1}{n} \sum_{i=1}^n \left  \frac{A_i - F_i}{A_i} \right $      |
| SMAPE   | $SMAPE = \frac{1}{n} \sum_{i=1}^n \frac{ A_i - F_i }{(A_i + F_i)/2}$        |
| RAE     | $RAE = \frac{\sum_{i=1}^n  F_i - A_i }{\sum_{i=1}^n  A_i - A }$             |
| RRSE    | $RRSE = \sqrt{\frac{\sum_{i=1}^n (A_i - F_i)^2}{\sum_{i=1}^n (A_i - A)^2}}$ |
| RMSE    | $RMSE = \sqrt{\sum_{i=1}^n \frac{(A_i - F_i)^2}{n}}$                        |

**Table S2.** Variable definition.

|    | Variables      | Description                             | Unit        |
|----|----------------|-----------------------------------------|-------------|
| X1 | Sex            | Male/Female                             | –           |
| X2 | Age in years   | Age in years                            | –           |
| X3 | Base IOP       | Baseline intraocular pressure measured  | mm-Hg       |
| X4 | Base Spherical | Baseline myopic power                   | Diopter (D) |
| X5 | Base SE        | Baseline spherical equivalent           | Diopter (D) |
| X6 | End Spherical  | Endpoint myopic power                   | Diopter (D) |
| X7 | End SE         | Endpoint spherical equivalent           | Diopter (D) |
| X8 | Total Duration | Total duration from first to last visit | month       |

|     |                                   |                                                                                    |          |
|-----|-----------------------------------|------------------------------------------------------------------------------------|----------|
| X9  | Total Cumulative Dosage           | Total cumulative dosage of topical atropine                                        | mg       |
| X10 | Total Average Dosage per month    | Average dosage per month from the first visit to the last visit                    | mg/month |
| X11 | Total Prescribed Bottles          | Number of prescription bottles of atropine                                         | bottles  |
| X12 | Previous Duration                 | The duration from the first visit to the recruitment date                          | month    |
| X13 | Previous Cumulative Dosage        | Cumulative dosage of topical atropine from the first visit to the recruitment date | mg       |
| X14 | Previous Average Dosage Per Month | Average dosage per month from the first visit to the recruitment date              | mg/month |
| X15 | Recruit Duration                  | The duration from the recruitment date to the last visit                           | month    |
| X16 | Recruit Cumulative Dosage         | Cumulative dosage of topical atropine from the recruitment date to the last visit  | mg       |
| X17 | Recruit Average Dosage Per Month  | Average dosage per month from the recruitment date to the last visit               | mg/month |
| X18 | Last Dosage                       | The prescribed dosage of atropine on the last visit                                | mg       |
| X19 | Last Frequency                    | The prescribed frequency of atropine on the last visit                             | -        |
| Y   | End IOP                           | Endpoint intraocular pressure measured                                             | mm-Hg    |

Note: IOP: intraocular pressure; SE: spherical equivalent.

**Table S3.** Participant demographics.

|     |                          | Mean ± SD     |
|-----|--------------------------|---------------|
| X2  | Age in years             | 10.53 ± 2.54  |
| X3  | Base IOP (mm-Hg)         | 14.51 ± 2.69  |
| X4  | Base Spherical (D)       | -1.95 ± 1.45  |
| X5  | Base SE (D)              | -2.48 ± 1.57  |
| X6  | End Spherical (D)        | -2.39 ± 1.68  |
| X7  | End SE (D)               | -2.94 ± 1.86  |
| X8  | Total Duration (month)   | 20.02 ± 12.01 |
| X11 | Total Prescribed Bottles | 6.47 ± 5.54   |

|     |                                              |                     |
|-----|----------------------------------------------|---------------------|
| X12 | Previous Duration (month)                    | 14.07 ± 12.14       |
| X15 | Recruit Duration (month)                     | 5.96 ± 3.83         |
| Y   | End IOP (mm-Hg)                              | 15.08 ± 2.86        |
|     |                                              | <b>Median (IQR)</b> |
| X9  | Total Cumulative Dosage (mg)                 | 75.00 (37.5–150)    |
| X10 | Total Average Dosage per month (mg/month)    | 4.35 (2.66–7.87)    |
| X13 | Previous Cumulative Dosage (mg)              | 45.00 (25–87.5)     |
| X14 | Previous Average Dosage Per Month (mg/month) | 6.42 (2.34–15.99)   |
| X16 | Recruit Cumulative Dosage (mg)               | 12.50 (0–55)        |
| X17 | Recruit Average Dosage Per Month (mg/month)  | 2.35 (0–11.93)      |
| X1  | Sex                                          | <b>n (%)</b>        |
|     | Male                                         | 813 (52.6%)         |
|     | Female                                       | 732 (47.4%)         |
| X18 | Last Dosage (mg)                             | <b>n (%)</b>        |
|     | 0                                            | 4 (0.3%)            |
|     | 5                                            | 619 (40.1%)         |
|     | 12.5                                         | 718 (46.5%)         |
|     | 25                                           | 146 (9.4%)          |
|     | 50                                           | 58 (3.8%)           |
| X19 | Last Frequency                               | <b>n (%)</b>        |
|     | QN                                           | 1191 (77.1%)        |
|     | QON                                          | 238 (15.4%)         |
|     | BIW                                          | 80 (5.2%)           |
|     | QW                                           | 32 (2.1%)           |
|     | 0                                            | 4 (0.3%)            |

Note: SD: standard deviation; IQR: interquartile range; IOP: intraocular pressure; SE: spherical equivalent; QN: every night; QON: every other night; BIW: twice a week; QW: once a week.
